# Supplementary material for: Coilin association with Box C/D scaRNA suggests a direct role for the Cajal body marker protein in scaRNP biogenesis
Source: PubMed Central journal article supplement (PMC3988793; doi:10.1242/bio.20147443), 2014-03-21
Supplement: supp_bio.20147443_bio.20147443-s1.pdf [file supp_bio.20147443_bio.20147443-s1.pdf]

## Supplementary Material

Isioma I. Enwerem et al. doi: 10.1242/bio.20147443

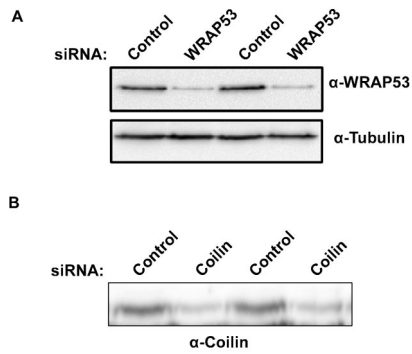

**Fig. S1.** (A) Cell lysates from knockdowns in Fig. 2A were subjected to SDS-PAGE and Western blot analysis, and the blot probed with  $\alpha$ -WRAP53 or  $\alpha$ -tubulin antibodies. (B) Cell lysates from the experiment in Fig. 2B were subjected to SDS-PAGE and Western blot analysis, and blot probed with  $\alpha$ -coilin antibody.

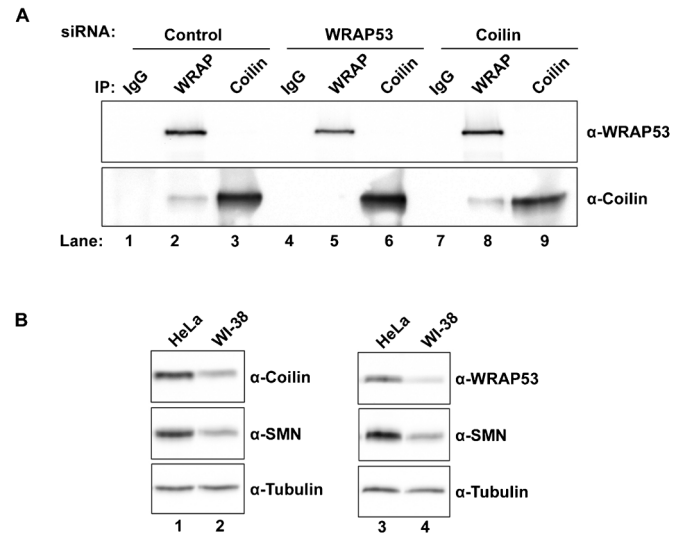

**Fig. S2.** (A) The IP beads used in Fig. 7 were subjected to SDS-PAGE and Western blot analysis, and the blots probed with  $\alpha$ -WRAP53 or  $\alpha$ -coilin antibodies. (B) Comparison of coilin, WRAP53 and SMN levels in HeLa and WI-38 cells. Equal amounts of total protein from HeLa and WI-38 cells were subjected to SDS-PAGE and Western blot analysis with the indicated antibody. Blots were probed with anti-tubulin as a loading control.
